# Supplementary material
Source: PubMed Central journal article supplement (PMC3896201)
Supplement: 1321748111_pnas.201321748SI.pdf [file 1321748111_pnas.201321748SI.pdf]

# Supporting Information

Wang et al. 10.1073/pnas.1321748111

**Table S1. Kinetics of cytokine production of 18 H7N9 virus-infected patients**

| Group | Patient no. | Sex | Age, y | Days after onset of illness | IL-6, pg/mL | IL-8, pg/mL | MIP-1 $\beta$ , pg/mL |
|-------|-------------|-----|--------|-----------------------------|-------------|-------------|-----------------------|
| A     | a73         | M   | 53     | 6                           | 9.4         | 7.6         | 4.4                   |
|       |             |     |        | 9                           |             | 38.5        | 0.0                   |
|       | a107        | M   | 47     | 13                          | 16.3        | 0.0         | 0.0                   |
|       |             |     |        | 7                           |             | 39.4        | 7.1                   |
|       |             |     |        | 9                           |             | 27.4        | 5.0                   |
|       |             |     |        | 13                          |             | 11.6        | 0.0                   |
|       | a49         | M   | 68     | 15                          | 29.0        | 16.0        | 8.5                   |
|       |             |     |        | 9                           |             | 13.1        | 18.5                  |
|       |             |     |        | 10                          |             | 21.0        | 6.3                   |
|       |             |     |        | 14                          |             | 16.2        | 0.0                   |
|       | a10         | M   | 65     | 18                          | 13.8        | 0.0         | 0.0                   |
|       |             |     |        | 9                           |             | 9.2         | 0.0                   |
|       |             |     |        | 13                          |             | 0.0         | 0.0                   |
|       | a134        | F   | 74     | 17                          | 105.2       | 13.8        | 5.0                   |
|       |             |     |        | 8                           |             | 22.6        | 14.6                  |
|       |             |     |        | 11                          |             | 67.3        | 45.0                  |
|       | a78         | M   | 74     | 17                          | 39.5        | 21.0        | 16.0                  |
|       |             |     |        | 10                          |             | 19.0        | 5.9                   |
|       |             |     |        | 14                          |             | 33.8        | 5.4                   |
|       | a20         | F   | 81     | 18                          | 134.6       | 0.0         | 0.0                   |
|       |             |     |        | 22                          |             | 837.3       | 40.4                  |
|       |             |     |        | 6                           |             | 47.0        | 26.6                  |
|       |             |     |        | 10                          |             | 110.5       | 50.0                  |
|       | a9          | M   | 67     | 14                          | 76.0        | 110.6       | 18.5                  |
|       |             |     |        | 20                          |             | 60.0        | 7.0                   |
|       |             |     |        | 14                          |             | 20.3        | 25.4                  |
|       | a130        | M   | 67     | 18                          | 23.7        | 38.5        | 0.0                   |
|       |             |     |        | 22                          |             | 10.7        | 0.0                   |
|       |             |     |        | 10                          |             | 7.5         | 0.0                   |
|       |             |     |        | 11                          |             | 0.0         | 0.0                   |
| a79   | M           | 78  | 13     | 25.9                        | 14.8        | 0.0         |                       |
|       |             |     | 17     |                             | 0.0         | 0.0         |                       |
|       |             |     | 11     |                             | 28.1        | 25.4        |                       |
|       |             |     | 14     |                             | 30.3        | 0.0         |                       |
| a11   | F           | 75  | 18     | 17.4                        | 12.5        | 0.0         |                       |
|       |             |     | 26     |                             | 0.0         | 0.0         |                       |
|       |             |     | 10     |                             | 18.6        | 0.0         |                       |
|       |             |     | 13     |                             | 11.6        | 8.5         |                       |
| a12   | M           | 62  | 17     | 34.8                        | 53.3        | 0.0         |                       |
|       |             |     | 27     |                             | 25.2        | 0.0         |                       |
|       |             |     | 9      |                             | 34.6        | 39.1        |                       |
|       |             |     | 13     |                             | 106.0       | 16.2        |                       |
| B     | a131        | F   | 79     | 17                          | 88.6        | 38.5        | 0.0                   |
|       |             |     |        | 25                          |             | 19.4        | 10.4                  |
|       |             |     |        | 9                           |             | 110.7       | 84.6                  |
|       |             |     |        | 11                          |             | 72.9        | 24.0                  |
|       |             |     |        | 15                          |             | 141.5       | 50.0                  |
| a22   | M           | 58  | 21     | 122.0                       | 35.1        | 10.4        |                       |
|       |             |     | 24     |                             | 40.4        | 23.0        |                       |
|       |             |     | 28     |                             | 44.3        | 10.4        |                       |
|       |             |     | 32     |                             | 48.3        | 76.3        |                       |
| a33   | M           | 56  | 40     | 31.4                        | 34.2        | 53.0        |                       |
|       |             |     | 9      |                             | 30.6        | 0.0         |                       |
|       |             |     | 11     |                             | 146.9       | 31.8        |                       |
|       |             |     |        | 12                          |             | 35.4        | 0.0                   |

**Table S1. Cont.**

| Group | Patient no. | Sex | Age, y | Days after onset of illness | IL-6, pg/mL | IL-8, pg/mL | MIP-1 $\beta$ , pg/mL |
|-------|-------------|-----|--------|-----------------------------|-------------|-------------|-----------------------|
|       |             |     |        | 16                          |             | 45.7        | 0.0                   |
|       |             |     |        | 24                          | 429.7       | 254.9       | 111.0                 |
| a118  | M           | 88  |        | 10                          | 516.9       | 57.1        | 29.7                  |
|       |             |     |        | 12                          | 52.5        | 211.1       | 34.0                  |
|       |             |     |        | 16                          | 25.4        | 82.5        | 14.0                  |
|       |             |     |        | 20                          | 1,394.0     | 1,935.0     | 69.0                  |
| a150  | M           | 80  |        | 16                          | 198.0       | 70.4        | 27.8                  |
|       |             |     |        | 18                          | 163.0       | 201.9       |                       |
| a90   | M           | 74  |        | 9                           | 215.7       | 39.9        | 15.9                  |
|       |             |     |        | 11                          | 9.4         | 30.7        | 0.0                   |

MIP, macrophage inflammatory protein.

**Table S2. Inflammatory cytokines in plasma and bronchoalveolar lavage in H7N9 virus-infected patients**

| Inflammatory cytokines, pg/mL | Patient no. |         |         |
|-------------------------------|-------------|---------|---------|
|                               | a33         | a22     | a118    |
| IL-10                         |             |         |         |
| Plasma                        | 3.6         | 8.5     | 13.2    |
| BAL*                          | 59.4        | 9.9     | 42.8    |
| IL-1 $\beta$                  |             |         |         |
| Plasma                        | 0           | 0       | 0       |
| BAL                           | 3,439       | 2,841.3 | 1,746.7 |
| IL-6                          |             |         |         |
| Plasma                        | 39.3        | 118.5   | 645.3   |
| BAL                           | 26,010      | 1,812.1 | 4,510.2 |
| IL-8                          |             |         |         |
| Plasma                        | 17.8        | 85.3    | 1,935   |
| BAL                           | 27,221      | 23,507  | 27,221  |
| TNF- $\alpha$                 |             |         |         |
| Plasma                        | 0           | 0       | 0       |
| BAL                           | 654.5       | 24      | 28.6    |
| MIP-1 $\alpha$                |             |         |         |
| Plasma                        | 0           | 15.6    | 0       |
| BAL                           | 1,630.2     | 625.6   | 349.6   |
| MIP-1 $\beta$                 |             |         |         |
| Plasma                        | 11.3        | 246.2   | 138.5   |
| BAL                           | 6,277.6     | 1,191.7 | 603.8   |
| IFN- $\gamma$                 |             |         |         |
| Plasma                        | 2.6         | 2.6     | 8.3     |
| BAL                           | 11.9        | 1.8     | 4.6     |

\*A 5-mL bronchoalveolar lavage (BAL) sample was collected from the right lower lobe of each patient.

**Table S3. Association between rs12252 variants, time from disease onset to admission, virus titer, outcome of patients, and ventilation intervention**

| Patient no. | Days from disease onset to |             |                                    |           | Virus titers at days after disease onset, log <sub>10</sub> |       |        |        |        |        |        |           | Respiratory assistance |
|-------------|----------------------------|-------------|------------------------------------|-----------|-------------------------------------------------------------|-------|--------|--------|--------|--------|--------|-----------|------------------------|
|             | rs12252                    | Oseltamivir | First methylprednisolone treatment | Admission | Day 8                                                       | Day 9 | Day 10 | Day 11 | Day 12 | Day 13 | Day 14 | Outcome   |                        |
| a9          | C/C                        | 5           | 4                                  | 9         | <2                                                          | <2    | ND     | ND     | ND     | ND     | ND     | Discharge |                        |
| a33         | C/C                        | 3           | 7                                  | 2         | ND                                                          | 2.85  | 5.34   | 5.06   | <2     | <2     | 3.75   | Death     | ECMO                   |
| a20         | C/C                        | 5           | 6                                  | 5         | 3.22                                                        | 3.7   | <2     | 3.04   | <2     | 4.13   | <2     | Discharge | Mechanical             |
| a131        | C/C                        | 6           | 6                                  | 6         | 4.75                                                        | <2    | ND     | <2     | 3      | <2     | <2     | Death     | Mechanical             |
| a12         | C/C                        | 9           | 5                                  | 8         | ND                                                          | 2.15  | ND     | 5.76   | <2     | 3.96   | <2     | Discharge | Mechanical             |
| a73         | C/C                        | 5           | 5                                  | 6         | <2                                                          | <2    | <2     | <2     | <2     | <2     | ND     | Discharge |                        |
| a118        | T/C                        | 7           | 8                                  | 7         | 4.61                                                        | 5.67  | 5.46   | ND     | 3.55   | 5.35   | 5.03   | Death     | ECMO                   |
| a49         | T/C                        | 6           | No                                 | 7         | 3.11                                                        | 3.35  | <2     | <2     | <2     | <2     | <2     | Discharge |                        |
| a78         | T/C                        | 8           | 12                                 | 9         | <2                                                          | <2    | <2     | <2     | <2     | <2     | <2     | Discharge |                        |
| a107        | T/C                        | 5           | 5                                  | 5         | <2                                                          | <2    | <2     | 2.51   | <2     | <2     | <2     | Discharge |                        |
| a10         | T/C                        | 4           | No                                 | 5         | ND                                                          | <2    | <2     | ND     | <2     | <2     | 2.21   | Discharge |                        |
| a22         | T/C                        | 9           | 8                                  | 12        | <2                                                          | <2    | <2     | <2     | ND     | ND     | <2     | Death     | ECMO                   |
| a130        | T/C                        | 11          | 9                                  | 9         | ND                                                          | ND    | ND     | ND     | ND     | ND     | ND     | Discharge |                        |
| a79         | T/T                        | 11          | 15                                 | 9         | ND                                                          | ND    | ND     | 2.36   | <2     | <2     | <2     | Discharge | Mechanical             |
| a134        | T/T                        | 8           | No                                 | 7         | 3.71                                                        | <2    | 3.41   | ND     | <2     | <2     | <2     | Discharge |                        |
| a11         | T/T                        | 8           | 9                                  | 9         | ND                                                          | 3.05  | ND     | 2.44   | <2     | <2     | <2     | Discharge |                        |

Viral titers were determined by real-time PCR for cDNA copies from throat swabs in log<sub>10</sub> copies per milliliter of viral transport medium. To confirm H7N9 infection, samples were collected from stools, urine, and plasma. H7N9 infection was diagnosed when one of those samples was tested positive by two independent centers. ECMO, extracorporeal membrane oxygenation; ND, not determined.
